# Supplementary material
Source: publisher figshare collection journal article supplement (https://tandf.figshare.com/ndownloader/files/14207159)
Supplement: Supplementary file 1 [file 14207159]

**Supplemental figure legend**

**Supplemental Figure 1**. A full set of the abdominal computed tomography slices (axial view) during the portal venous phase, 70 seconds post injection of the contrast.
